# Supplementary material for: X-linked inhibitor of apoptosis protein mediates tumor cell resistance to antibody-dependent cellular cytotoxicity
Source: PubMed Central journal article supplement (PMC4816185; doi:10.1038/cddis.2015.412), 2016-01-28

**A**

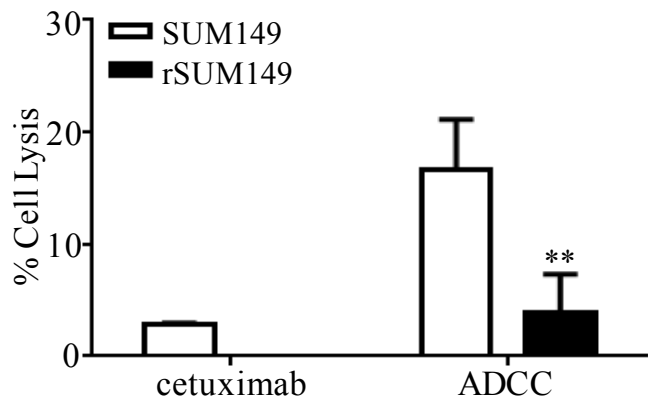

Supplement: cddis2015412x4.pdf [file cddis2015412x4.pdf]
